# Supplementary material
Source: HighWire-hosted journal article supplement (https://bmjopen.bmj.com/content/9/2/e024685)
Supplement: inline-supplementary-material-1 [file inline-supplementary-material-1.pdf]

# Online supplementary appendix

## ONLINE SUPPLEMENTARY TABLES

**Supplementary table S1.** Content of the BIP TIC ERP and BIP TIC HRT modules for children and parents.

| Module | BIP TIC ERP child                                               | BIP TIC HRT child                                                                 | BIP TIC ERP & HRT parent                                                                                                         |
|--------|-----------------------------------------------------------------|-----------------------------------------------------------------------------------|----------------------------------------------------------------------------------------------------------------------------------|
| 1      | Introduction*                                                   | Introduction*                                                                     | Introduction                                                                                                                     |
| 2      | Information about tics*                                         | Information about tics*                                                           | Common thoughts and feelings among parents                                                                                       |
| 3      | Response prevention                                             | Awareness training                                                                | Praising the child                                                                                                               |
| 4      | Response prevention<br>Exposure                                 | Competing response training                                                       | Reminding the child to use treatment strategies<br>Identifying and changing triggers that may provoke tics                       |
| 5      | Response prevention<br>Exposure                                 | Awareness training<br>Competing response training                                 | Praising the child<br>Reminding the child to use treatment strategies<br>Identifying and changing triggers that may provoke tics |
| 6      | Response prevention<br>Exposure<br>Negative thoughts about tics | Awareness training<br>Competing response training<br>Negative thoughts about tics | Same as Module 5                                                                                                                 |
| 7      | Response prevention<br>Exposure<br>Talking about tics           | Awareness training<br>Competing response training<br>Talking about tics           | Same as Module 5                                                                                                                 |

|    |                                                                                   |                                                                     |                                        |
|----|-----------------------------------------------------------------------------------|---------------------------------------------------------------------|----------------------------------------|
| 8  | Response prevention<br>Exposure<br>Tics in school                                 | Awareness training<br>Competing response training<br>Tics in school | Same as Module 5                       |
| 9  | Awareness training<br>Competing response training<br>Approaching end of treatment | Response prevention<br>Exposure<br>Approaching end of treatment     | Same as Module 5                       |
| 10 | Relapse prevention<br>End of treatment                                            | Relapse prevention<br>End of treatment                              | Relapse prevention<br>End of treatment |

**Note:** \* = The content of these modules is largely the same in the two interventions. BIP TIC ERP = internet-delivered exposure and response prevention; BIP TIC HRT = internet-delivered habit reversal training.

**Supplementary table S2.** Treatment credibility. Three weeks into treatment, children and parents rated the question “*How much do you expect you/your child will improve with this treatment?*” on a scale from 1 (“*Not improve at all*”) to 5 (“*Improve much*”).

|           | <b>BIP TIC ERP (n=12)</b> |                | <b>BIP TIC HRT (n=11)</b> |                |
|-----------|---------------------------|----------------|---------------------------|----------------|
|           | <b>Children</b>           | <b>Parents</b> | <b>Children</b>           | <b>Parents</b> |
| Mean (SD) | 3.67 (1.15)               | 3.17 (1.03)    | 3.55 (0.69)               | 3.36 (0.81)    |

**Note:** BIP TIC ERP = internet-delivered exposure and response prevention; BIP TIC HRT = internet-delivered habit reversal training; SD = standard deviation.

**Supplementary table S3.** Treatment satisfaction. At post-treatment, children and parents rated questions 1 and 2 on a scale from 1 (“*Very bad*”) to 5 (“*Very good*”), and question 3 on a scale from 1 (“*Treatment at a clinic*”) to 5 (“*Treatment via the internet*”).

|                                                                                                                                                | BIP TIC ERP (n=12) |             | BIP TIC HRT (n=11) |             |
|------------------------------------------------------------------------------------------------------------------------------------------------|--------------------|-------------|--------------------|-------------|
|                                                                                                                                                | Children           | Parents     | Children           | Parents     |
| 1. “ <i>What did you think about the treatment?</i> ”                                                                                          | 4.25 (0.87)        | 4.17 (0.83) | 3.91 (0.70)        | 4.09 (0.83) |
| 2. “ <i>Would you recommend the treatment to a friend with tics?</i> ”                                                                         | 4.25 (1.14)        | 4.58 (0.67) | 3.91 (1.30)        | 4.27 (0.79) |
| 3. “ <i>If you had been able to choose, would you have preferred seeing a therapist at a clinic or receiving treatment via the internet?</i> ” | 3.92 (1.00)        | 3.75 (1.29) | 3.91 (1.14)        | 3.18 (1.47) |

**Note:** All values are means (SD). BIP TIC ERP = internet-delivered exposure and response prevention; BIP TIC HRT = internet-delivered habit reversal training; SD = standard deviation.

**Supplementary table S4.** Secondary outcome measures for the BIP TIC ERP and BIP TIC HRT groups at all measure points.

|                                | BIP TIC ERP (n=12)     |                                      |                                       | BIP TIC HRT (n=11)     |                                      |                                       |
|--------------------------------|------------------------|--------------------------------------|---------------------------------------|------------------------|--------------------------------------|---------------------------------------|
|                                | Mean (SD) <sup>A</sup> | Within-group difference <sup>B</sup> | Within-group effect size <sup>C</sup> | Mean (SD) <sup>A</sup> | Within-group difference <sup>B</sup> | Within-group effect size <sup>C</sup> |
|                                |                        | Coefficient (95% CI); p-value        | Cohens' d (95% CI)                    |                        | Coefficient (95% CI); p-value        | Cohens' d (95% CI)                    |
| PTQ                            |                        |                                      |                                       |                        |                                      |                                       |
| Total Tic Severity             |                        |                                      |                                       |                        |                                      |                                       |
| Baseline                       | 43.50 (17.62)          | -                                    | -                                     | 39.73 (22.40)          | -                                    | -                                     |
| Mid-treatment                  | 26.83 (12.48)          | -16.67 (-24.02 to -9.31); p<0.001*   | 1.09 (0.22 to 1.94)                   | 32.10 (29.66)          | -7.31 (-15.68 to 1.06); p=0.087      | 0.29 (-0.57 to 1.15)                  |
| Post-treatment                 | 21.08 (12.30)          | -22.42 (-29.77 to -15.06); p<0.001*  | 1.48 (0.55 to 2.37)                   | 27.09 (25.59)          | -12.64 (-20.75 to -4.53); p=0.002*   | 0.53 (-0.33 to 1.37)                  |
| 3-month follow-up <sup>D</sup> | 18.67 (13.06)          | -24.83 (-32.19 to -17.48); p<0.001*  | 1.60 (0.66 to 2.52)                   | 27.00 (22.05)          | -12.73 (-20.84 to -4.62); p=0.002*   | 0.57 (-0.29 to 1.42)                  |
| 6-month follow-up              | 24.50 (36.67)          | 5.83 (-7.77 to 19.43); p=0.401       | -0.21 (-1.01 to 0.59)                 | 23.82 (17.81)          | -3.18 (-15.40 to 9.04); p=0.610      | 0.16 (-0.68 to 0.99)                  |
| 12-month follow-up             | 18.25 (13.40)          | -0.42 (-14.02 to 13.18); p=0.952     | 0.03 (-0.77 to 0.83)                  | 33.00 (33.62)          | 6.00 (-6.22 to 18.22); p=0.336       | -0.21 (-1.05 to 0.63)                 |
| Motor Tic Severity             |                        |                                      |                                       |                        |                                      |                                       |
| Baseline                       | 28.50 (14.52)          | -                                    | -                                     | 28.45 (10.79)          | -                                    | -                                     |
| Mid-treatment                  | 17.25 (8.16)           | -11.25 (-17.15 to -5.35); p<0.001*   | 0.96 (0.10 to 1.79)                   | 21.30 (15.25)          | -6.54 (-11.45 to -1.63); p=0.009*    | 0.55 (-0.33 to 1.41)                  |
| Post-treatment                 | 14.83 (8.97)           | -13.67 (-19.56 to -7.77); p<0.001*   | 1.13 (0.25 to 1.99)                   | 16.91 (10.67)          | -11.55 (-16.30 to -6.79); p<0.001*   | 1.08 (0.17 to 1.96)                   |
| 3-month follow-up <sup>D</sup> | 12.08 (8.26)           | -16.42 (-22.31 to -10.52); p<0.001*  | 1.39 (0.48 to 2.28)                   | 18.18 (11.32)          | -10.27 (-15.03 to -5.52); p<0.001*   | 0.93 (0.04 to 1.80)                   |
| 6-month follow-up              | 14.00 (19.53)          | 1.92 (-6.58 to 10.42); p=0.659       | -0.13 (-0.93 to 0.67)                 | 15.91 (11.40)          | -2.27 (-7.37 to 2.83); p=0.383       | 0.20 (-0.64 to 1.04)                  |
| 12-month follow-up             | 12.25 (9.91)           | 0.17 (-8.33 to 8.67); p=0.969        | -0.02 (-0.82 to 0.78)                 | 21.55 (14.24)          | 3.36 (-1.74 to 8.47); p=0.196        | -0.26 (-1.10 to 0.58)                 |
| Vocal Tic Severity             |                        |                                      |                                       |                        |                                      |                                       |
| Baseline                       | 15.00 (11.72)          | -                                    | -                                     | 11.27 (14.62)          | -                                    | -                                     |
| Mid-treatment                  | 9.58 (8.28)            | -5.42 (-10.29 to -0.54); p=0.029*    | 0.53 (-0.29 to 1.34)                  | 10.80 (15.80)          | -0.79 (-6.61 to 5.03); p=0.791       | 0.03 (-0.83 to 0.89)                  |
| Post-treatment                 | 6.25 (6.12)            | -8.75 (-13.63 to -3.87); p<0.001*    | 0.94 (0.08 to 1.77)                   | 10.18 (18.06)          | -1.09 (-6.73 to 4.55); p=0.705       | 0.07 (-0.77 to 0.90)                  |
| 3-month follow-up <sup>D</sup> | 6.58 (7.09)            | -8.42 (-13.29 to -3.54); p=0.001*    | 0.87 (0.02 to 1.70)                   | 8.82 (14.30)           | -2.45 (-8.10 to 3.19); p=0.394       | 0.17 (-0.67 to 1.01)                  |
| 6-month follow-up              | 10.50 (17.48)          | 3.92 (-2.51 to 10.34); p=0.232       | -0.29 (-1.10 to 0.51)                 | 7.91 (10.34)           | -0.91 (-9.25 to 7.43); p=0.831       | 0.07 (-0.76 to 0.91)                  |
| 12-month follow-up             | 6.00 (7.54)            | -0.58 (-7.01 to 5.84); p=0.859       | 0.08 (-0.72 to 0.88)                  | 11.45 (23.12)          | 2.64 (-5.70 to 10.97); p=0.535       | -0.14 (-0.97 to 0.70)                 |

|                                |               |                                      |                       |               |                                      |                       |
|--------------------------------|---------------|--------------------------------------|-----------------------|---------------|--------------------------------------|-----------------------|
| PUTS                           |               |                                      |                       |               |                                      |                       |
| Baseline                       | 23.08 (6.93)  | -                                    | -                     | 22.73 (5.52)  | -                                    | -                     |
| Mid-treatment                  | 22.08 (6.80)  | -1.00 (-3.44 to 1.44); $p=0.422$     | 0.15 (-0.66 to 0.95)  | 19.40 (7.01)  | -2.62 (-5.87 to 0.64); $p=0.115$     | 0.53 (-0.35 to 1.40)  |
| Post-treatment                 | 22.92 (6.33)  | -0.17 (-2.61 to 2.27); $p=0.893$     | 0.03 (-0.78 to 0.83)  | 22.64 (8.96)  | -0.09 (-3.24 to 3.06); $p=0.955$     | 0.01 (-0.82 to 0.85)  |
| 3-month follow-up <sup>D</sup> | 21.33 (6.53)  | -1.75 (-4.19 to 0.69); $p=0.160$     | 0.26 (-0.55 to 1.06)  | 20.64 (8.19)  | -2.09 (-5.24 to 1.06); $p=0.194$     | 0.30 (-0.54 to 1.14)  |
| 6-month follow-up              | 22.92 (5.73)  | 1.58 (-0.49 to 3.66); $p=0.135$      | -0.26 (-1.06 to 0.55) | 21.73 (8.96)  | 1.09 (-1.05 to 3.23); $p=0.317$      | -0.13 (-0.96 to 0.71) |
| 12-month follow-up             | 22.83 (5.75)  | 1.50 (-0.58 to 3.58); $p=0.157$      | -0.02 (-1.04 to 0.56) | 21.73 (8.25)  | 1.09 (-1.05 to 3.23); $p=0.317$      | -0.13 (-0.97 to 0.71) |
| GTS-QOL                        |               |                                      |                       |               |                                      |                       |
| Baseline                       | 23.50 (14.37) | -                                    | -                     | 28.27 (18.86) | -                                    | -                     |
| Post-treatment                 | 14.58 (10.33) | -8.92 (-17.27 to -0.57); $p=0.036^*$ | 0.71 (-0.12 to 1.53)  | 29.18 (20.00) | 0.91 (-5.46 to 7.28); $p=0.780$      | -0.05 (-0.88 to 0.79) |
| 3-month follow-up <sup>D</sup> | 14.75 (15.15) | -8.75 (-17.10 to -0.40); $p=0.040^*$ | 0.59 (-0.23 to 1.41)  | 21.55 (15.12) | -6.73 (-13.10 to -0.36); $p=0.038^*$ | 0.39 (-0.46 to 1.23)  |
| 6-month follow-up              | 17.67 (18.19) | 2.92 (-2.31 to 8.15); $p=0.274$      | -0.17 (-0.97 to 0.63) | 21.55 (15.08) | 0.00 (-5.73 to 5.73); $p=1.000$      | 0.00 (-0.84 to 0.84)  |
| 12-month follow-up             | 19.92 (15.92) | 5.17 (-0.06 to 10.40); $p=0.053$     | -0.33 (-1.13 to 0.48) | 21.45 (14.71) | -0.09 (-5.82 to 5.63); $p=0.975$     | 0.00 (-0.83 to 0.84)  |
| OCI-CV                         |               |                                      |                       |               |                                      |                       |
| Baseline                       | 6.67 (4.64)   | -                                    | -                     | 6.55 (7.22)   | -                                    | -                     |
| Post-treatment                 | 7.83 (7.26)   | 1.17 (-0.82 to 3.15); $p=0.249$      | -0.19 (-0.99 to 0.61) | 8.91 (8.34)   | 2.36 (0.28 to 4.44); $p=0.026^*$     | -0.30 (-1.14 to 0.54) |
| 3-month follow-up <sup>D</sup> | 6.92 (7.37)   | 0.25 (-1.73 to 2.23); $p=0.805$      | -0.04 (-0.84 to 0.76) | 6.91 (7.69)   | 0.36 (-1.72 to 2.44); $p=0.732$      | -0.05 (-0.88 to 0.79) |
| 6-month follow-up              | 8.08 (8.52)   | 1.17 (-0.64 to 2.97); $p=0.206$      | -0.15 (-0.95 to 0.66) | 6.82 (7.61)   | -0.09 (-1.91 to 1.73); $p=0.922$     | 0.01 (-0.82 to 0.85)  |
| 12-month follow-up             | 10.42 (8.83)  | 3.50 (1.69 to 5.31); $p<0.001^*$     | -0.43 (-1.24 to 0.38) | 6.55 (6.07)   | -0.36 (-2.19 to 1.46); $p=0.696$     | 0.05 (-0.78 to 0.89)  |
| CDI-S                          |               |                                      |                       |               |                                      |                       |
| Baseline                       | 1.83 (1.99)   | -                                    | -                     | 4.00 (4.73)   | -                                    | -                     |
| Mid-treatment                  | 1.17 (1.27)   | -0.67 (-1.44 to 0.11); $p=0.091$     | 0.40 (-0.41 to 1.20)  | 3.60 (3.66)   | 0.23 (-0.99 to 1.45); $p=0.715$      | 0.09 (-0.76 to 0.95)  |
| Post-treatment                 | 0.83 (1.40)   | -1.00 (-1.77 to -0.23); $p=0.011$    | 0.58 (-0.24 to 1.39)  | 4.36 (4.06)   | 0.36 (-0.82 to 1.55); $p=0.547$      | -0.08 (-0.92 to 0.75) |
| 3-month follow-up <sup>D</sup> | 1.00 (1.28)   | -0.83 (-1.61 to -0.06); $p=0.035$    | 0.50 (-0.32 to 1.31)  | 3.82 (3.06)   | -0.18 (-1.37 to 1.00); $p=0.763$     | 0.05 (-0.79 to 0.88)  |
| 6-month follow-up              | 1.58 (2.27)   | 0.58 (-0.36 to 1.53); $p=0.227$      | -0.32 (-1.12 to 0.49) | 4.73 (4.13)   | 0.91 (-0.68 to 2.49); $p=0.261$      | -0.25 (-1.09 to 0.59) |
| 12-month follow-up             | 1.67 (2.31)   | 0.67 (-0.28 to 1.61); $p=0.167$      | -0.36 (-1.16 to 0.45) | 4.64 (4.84)   | 0.82 (-0.77 to 2.40); $p=0.312$      | -0.20 (-1.04 to 0.64) |

|                                |              |                                     |                                   |              |                                     |                                   |
|--------------------------------|--------------|-------------------------------------|-----------------------------------|--------------|-------------------------------------|-----------------------------------|
| SMFQ                           |              |                                     |                                   |              |                                     |                                   |
| Baseline                       | 5.50 (3.66)  | -                                   | -                                 | 6.45 (5.91)  | -                                   | -                                 |
| Mid-treatment                  | 3.67 (2.46)  | -1.83 (-3.51 to -0.15); $p=0.033^*$ | 0.59 (-0.24 to 1.40)              | 7.30 (6.36)  | 1.87 (0.33 to 3.42); $p=0.018^*$    | -0.14 (-0.99 to 0.72)             |
| Post-treatment                 | 2.08 (3.34)  | -3.42 (-5.10 to -1.74); $p<0.001^*$ | 0.98 (0.12 to 1.82)               | 5.73 (5.66)  | -0.73 (-2.23 to 0.77); $p=0.341$    | 0.13 (-0.71 to 0.96)              |
| 3-month follow-up <sup>D</sup> | 4.08 (3.90)  | -1.42 (-3.10 to 0.26); $p=0.099$    | 0.38 (-0.44 to 1.18)              | 7.00 (7.04)  | 0.55 (-0.95 to 2.04); $p=0.475$     | -0.08 (-0.92 to 0.75)             |
| 6-month follow-up              | 3.83 (4.90)  | -0.25 (-1.74 to 1.24); $p=0.742$    | 0.06 (-0.74 to 0.86)              | 7.45 (7.87)  | 0.45 (-1.29 to 2.20); $p=0.609$     | -0.06 (-0.90 to 0.78)             |
| 12-month follow-up             | 3.92 (3.34)  | -0.17 (-1.65 to 1.32); $p=0.826$    | 0.05 (-0.75 to 0.85)              | 7.00 (5.71)  | 0.00 (-1.74 to 1.74); $p=1.000$     | 0.00 (-0.84 to 0.84)              |
| WSAS-Y (child)                 |              |                                     |                                   |              |                                     |                                   |
| Baseline                       | 7.42 (6.42)  | -                                   | -                                 | 7.18 (5.15)  | -                                   | -                                 |
| Post-treatment                 | 4.25 (5.24)  | -3.17 (-6.39 to 0.05); $p=0.054$    | 0.54 (-0.28 to 1.35)              | 4.09 (4.89)  | -3.09 (-5.15 to -1.03); $p=0.003^*$ | 0.62 (-0.25 to 1.47)              |
| 3-month follow-up <sup>D</sup> | 4.58 (5.45)  | -2.83 (-6.05 to 0.39); $p=0.085$    | 0.48 (-0.34 to 1.28)              | 4.18 (3.66)  | -3.00 (-5.06 to -0.94); $p=0.004^*$ | 0.67 (-0.20 to 1.52)              |
| 6-month follow-up              | 5.08 (5.74)  | 0.50 (-1.37 to 2.37); $p=0.599$     | -0.09 (-0.89 to 0.71)             | 4.45 (5.07)  | 0.27 (-2.65 to 3.20); $p=0.855$     | -0.06 (-0.90 to 0.77)             |
| 12-month follow-up             | 3.83 (5.80)  | -0.75 (-2.62 to 1.12); $p=0.431$    | 0.13 (-0.67 to 0.93)              | 4.91 (7.50)  | 0.73 (-2.20 to 3.65); $p=0.626$     | -0.12 (-0.96 to 0.71)             |
| WSAS-Y (parent)                |              |                                     |                                   |              |                                     |                                   |
| Baseline                       | 8.83 (4.82)  | -                                   | -                                 | 8.64 (9.07)  | -                                   | -                                 |
| Post-treatment                 | 7.42 (5.00)  | -1.42 (-4.41 to 1.57); $p=0.353$    | 0.29 (-0.52 to 1.09)              | 6.64 (7.38)  | -2.00 (-4.53 to 0.53); $p=0.121$    | 0.24 (-0.60 to 1.08)              |
| 3-month follow-up <sup>D</sup> | 5.92 (6.36)  | -2.92 (-5.91 to 0.07); $p=0.056$    | 0.52 (-0.30 to 1.33)              | 6.82 (6.57)  | -1.82 (-4.34 to 0.71); $p=0.158$    | 0.23 (-0.61 to 1.07)              |
| 6-month follow-up              | 6.08 (8.10)  | 0.17 (-2.82 to 3.15); $p=0.913$     | -0.02 (-0.82 to 0.78)             | 8.45 (8.51)  | 1.64 (-1.08 to 4.35); $p=0.238$     | -0.22 (-1.05 to 0.63)             |
| 12-month follow-up             | 4.83 (5.69)  | -1.08 (-4.07 to 1.90); $p=0.477$    | 0.18 (-0.62 to 0.98)              | 6.82 (8.47)  | 0.00 (-2.72 to 2.72); $p=1.000$     | 0.00 (-0.84 to 0.84)              |
| CGAS                           |              |                                     |                                   |              |                                     |                                   |
| Baseline                       | 58.25 (4.41) | -                                   | -                                 | 55.64 (4.67) | -                                   | -                                 |
| Post-treatment                 | 64.42 (7.08) | 6.17 (3.99 to 8.34); $p<0.001^*$    | 1.05 (0.18 to 1.89) <sup>E</sup>  | 58.73 (4.94) | 3.09 (0.23 to 5.95); $p=0.034^*$    | 0.64 (-0.22 to 1.49) <sup>E</sup> |
| 3-month follow-up <sup>D</sup> | 65.75 (6.11) | 7.50 (5.33 to 9.67); $p<0.001^*$    | 1.41 (0.49 to 2.30) <sup>E</sup>  | 61.18 (8.00) | 5.55 (2.68 to 8.41); $p<0.001^*$    | 0.85 (-0.04 to 1.71) <sup>E</sup> |
| 6-month follow-up              | 66.75 (8.18) | 1.00 (-0.93 to 2.93); $p=0.310$     | 0.14 (-0.66 to 0.94) <sup>E</sup> | 62.09 (8.22) | 0.91 (-1.23 to 3.05); $p=0.404$     | 0.11 (-0.73 to 0.95) <sup>E</sup> |
| 12-month follow-up             | 66.33 (7.48) | 0.58 (-1.35 to 2.52); $p=0.554$     | 0.09 (-0.72 to 0.89) <sup>E</sup> | 61.82 (8.64) | 0.64 (-1.50 to 2.77); $p=0.560$     | 0.08 (-0.76 to 0.91) <sup>E</sup> |

**Note:** A = Observed means; B = Coefficients at post-treatment and at the 3-month follow-up compare with baseline, while coefficients at the 6-month and 12-month follow-ups compare with the 3-month follow-up; C = All Cohen's *d* effect sizes are calculated from observed data. Post-treatment and the 3-month follow-up effect sizes compare with baseline, while the 6-month and 12-month follow-up effect sizes compare with the 3-month follow-up. Effect sizes of 0.2, 0.5, and 0.8 are considered small, moderate, and large, respectively; D = Primary endpoint; E = Effect sizes are inverted, so that an increase in CGAS is equivalent to a positive effect size; \* = Significant at an alpha level of 0.05.

Data is complete for all measures except for PTQ, PUTS, CDI-S and SMFQ, which is missing at mid-treatment in one participant in the BIP TIC HRT group.

BIP TIC ERP = internet-delivered exposure and response prevention; BIP TIC HRT = internet-delivered habit reversal training; CDI-S = Children's Depression Inventory – Short version; CGAS = Children's Global Assessment Scale; CI = confidence interval; GTS-QOL = Gilles de la Tourette Syndrome – Quality of Life Scale; OCI-CV = Obsessive Compulsive Inventory – Child version; PTQ = Parent Tic Questionnaire; PUTS = Premonitory Urge for Tics Scale; SD = standard deviation; SMFQ = Short Mood and Feelings Questionnaire – Parent version; WSAS-Y = Work and Social Adjustment Scale – Child/Parent version.



**Supplementary table S5.** Self-reported adverse events at mid-treatment and post-treatment for the BIP TIC ERP and BIP TIC HRT groups, according to the SMURF.

|                                                            | BIP TIC ERP ( <i>n</i> = 12) | BIP TIC HRT ( <i>n</i> = 11) |
|------------------------------------------------------------|------------------------------|------------------------------|
| <b>Adverse events from baseline to mid-treatment</b>       |                              |                              |
| Depressed mood, <i>n</i> (%)                               | 1 (1)                        | 5 (45)                       |
| Irritation/anger, <i>n</i> (%)                             | 1 (1)                        | 4 (36)                       |
| Increased tics, <i>n</i> (%)                               | 3 (25)                       | 2 (18)                       |
| Anxiety/worry, <i>n</i> (%)                                | 2 (17)                       | 2 (18)                       |
| Stress, <i>n</i> (%)                                       | 0 (0)                        | 2 (18)                       |
| Tiredness, <i>n</i> (%)                                    | 1 (1)                        | 1 (9)                        |
| <b>Adverse events from mid-treatment to post-treatment</b> |                              |                              |
| Irritation/anger, <i>n</i> (%)                             | 0 (0)                        | 2 (18)                       |
| Depressed mood, <i>n</i> (%)                               | 0 (0)                        | 1 (9)                        |
| Stress, <i>n</i> (%)                                       | 0 (0)                        | 1 (9)                        |
| Tiredness, <i>n</i> (%)                                    | 0 (0)                        | 1 (9)                        |
| Pain, <i>n</i> (%)                                         | 0 (0)                        | 1 (9)                        |
| Obsessions, <i>n</i> (%)                                   | 0 (0)                        | 1 (9)                        |
| Concentration problems, <i>n</i> (%)                       | 0 (0)                        | 1 (9)                        |

**Note:** BIP TIC ERP = internet-delivered exposure and response prevention; BIP TIC HRT = internet-delivered habit reversal training; SMURF = Safety Monitoring Uniform Report Form.

## ONLINE SUPPLEMENTARY FIGURES

### Supplementary figure S1. Screenshots from BIP TIC ERP and BIP TIC HRT.

#### 1. Overview and start page, with list of chapters (BIP TIC ERP).

Inloggad som: bipticdemo [Logga ut](#)

[Startsida](#)

[Startsida](#) [Meddelanden](#) [Mina svar](#) [Ladda ner](#) [Vanliga frågor](#)

### Startsida

| Del                                        | Antal steg | För vem? | Utförd                                                    |
|--------------------------------------------|------------|----------|-----------------------------------------------------------|
| Kapitel 1: Inledning                       | 13         | Barn     | Ej utförd <a href="#">Starta</a> <a href="#">Översikt</a> |
| Kapitel 2: Lära mig om tics                | 22         | Barn     | Ej utförd <a href="#">Starta</a> <a href="#">Översikt</a> |
| Kapitel 3: Att stoppa mina tics            | 18         | Barn     | Ej utförd <a href="#">Starta</a> <a href="#">Översikt</a> |
| Kapitel 4: Reta fram mina varningssignaler | 11         | Barn     | Ej utförd <a href="#">Starta</a> <a href="#">Översikt</a> |
| Kapitel 5: Fortsatt träning                | 11         | Barn     | Ej utförd <a href="#">Starta</a> <a href="#">Översikt</a> |
| Kapitel 6: Tankar                          | 15         | Barn     | Ej utförd <a href="#">Starta</a> <a href="#">Översikt</a> |
| Kapitel 7: Berätta om mina tics            | 18         | Barn     | Ej utförd <a href="#">Starta</a> <a href="#">Översikt</a> |
| Kapitel 8: Skola                           | 15         | Barn     | Ej utförd <a href="#">Starta</a> <a href="#">Översikt</a> |
| Kapitel 9: Slutspurten!                    | 13         | Barn     | Ej utförd <a href="#">Starta</a> <a href="#">Översikt</a> |
| Kapitel 10: Vad jag har lärt mig           | 14         | Barn     | Ej utförd <a href="#">Starta</a> <a href="#">Översikt</a> |
| Ticstränaren                               | 2          | Barn     | Ej utförd <a href="#">Starta</a> <a href="#">Översikt</a> |

Barn- och ungdomspsykiatri  
STOCKHOLMS LÄNS LÄNSTING

[Om Cookies »](#)

2. Encrypted messaging function, where the participant can send messages to the therapist.

Therapists respond within 24 hours on weekdays.

Inloggad som: bipticdemo [Logga ut](#)

**BIP** [Startside](#)

[Startside](#) [Meddelanden](#) [Mina svar](#) [Ladda ner](#) [Vanliga frågor](#)

## Meddelanden

[Inkorg](#) [Nytt meddelande](#) [Skickade](#) [Utkast](#)

Behandlare: Per Andrén

Angående:

Skriv meddelande:

[Spara som utkast](#) [Skicka](#)

Barn- och ungdomspsykiatri  
STOCKHOLMS LÄNS LANDSTING

[Om Cookies »](#)

### 3. Educational films, used for delivering psychoeducation and the treatment rationale.

Inloggad som: bipticdemo [Logga ut](#)

Kapitel 2: Lära mig om tics [Startsida](#)

STEG 10 AV 22 FILM

## Film 4: Varför man får tics

Denna film handlar om vad som **orsakar** tics, vad som **händer i hjärnan** då man har tics och varför dina "**hjärnbromsar**" är viktiga för behandlingen. Titta på filmen och klicka därefter på "Nästa" för att svara på några korta frågor.

Titta i **HD**, annars kommer filmen att se suddig ut. Titta gärna också i helskärmsläge :-)

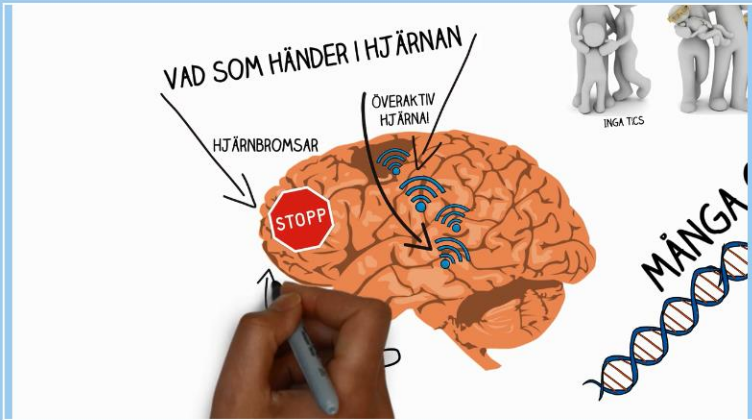

[Tillbaka](#) [Nästa](#)

## 4. Worksheets and exercises.

Inloggad som: bipticdemo [Logga ut.](#)

 Kapitel 4: Reta fram mina varnings signaler [Startsida](#)

STEG 9 AV 11 [ÖVA](#) 

### Stoppa mina tics - träning kapitel 4

Skriv här varje dag hur träningen går. Det går också bra att skriva på sidan 9 i din mapp med papper. Nästa gång du loggar in kan sedan du eller din förälder föra över det ni har skrivit, så att också din psykolog kan läsa.

Sista kolumnen frågar efter hur det har gått för dig att stoppa dina tics. Tänk både på den träning du har gjort själv och den du har gjort med din förälder. Välj en siffra mellan 0 och 5, där 0 betyder "jättedåligt" och 5 "jättebra". Det går också bra att beskriva med ord om du vill.

Ni hittar lätt tillbaka till denna sida genom att klicka på "**Mina svar**" och därefter "**Stoppa mina tics - träning kapitel 4**".

| Dag       | I vilka "Mina viktiga situationer" tränade du själv? | Hur länge tränade du med din förälder? | Hur gick dagens träning (0-5)? |
|-----------|------------------------------------------------------|----------------------------------------|--------------------------------|
| Skriv här | Skriv här                                            | Skriv här                              | Skriv här                      |
| Skriv här | Skriv här                                            | Skriv här                              | Skriv här                      |
| Skriv här | Skriv här                                            | Skriv här                              | Skriv här                      |
| Skriv här | Skriv här                                            | Skriv här                              | Skriv här                      |

5. Stopwatch with high score lists, to help practice tic suppression (BIP TIC ERP).

The screenshot shows the BIP TIC ERP stopwatch interface. At the top, there is a header with the BIP logo on the left, the text "Inloggad som: bipticdemo" and a "Logga ut" button on the right, and a navigation bar with "Ticstränaren" and "Startsida" buttons. Below the header, the page is titled "STEG 2 AV 2" and "Ticstränaren". The main content area features a stopwatch with a large digital display showing "00:00". Below the display are two buttons: "Starta" (green) and "Stoppa" (orange). To the right of the stopwatch, there is a text box with the instruction "Så fort ett tics kommer, tryck mellanslag eller klicka Stoppa." and a small image of a hand pressing a key on a keyboard. Below the stopwatch and instruction box, there is a navigation bar with left and right arrows and the text "Nivå 6: Vid köksbordet". Below this, there is a text box showing "Ditt rekord för nivå 6 är 01:25" and two buttons: "Se topplista" and "Ändra nivåer". At the bottom of the interface, there are two buttons: "Tillbaka" (with a left arrow) and "Avsluta" (with a right arrow).

## 6. Films illustrating a wide range of competing responses (BIP TIC HRT).

Inloggad som: bipticdemo [Logga ut](#)

Kapitel 4: Ticsstopparen [Startsida](#)

**BIP**

STEG 9 AV 18 FILM 

### Filmer på ticsstoppare - rörelsetics

Här kan du se Per visa **exempel på ticsstoppare för rörelsetics**. Tänk på det tics som du har valt att jobba med. Läs rubrikerna och titta på de filmer som du tror kan passa just detta tics. Filmerna kommer också att komma tillbaka i senare kapitel.

- Ögon >
- Ansikte/näsa >
- Mun >**
- Huvud/nacke >
- Axlar >
- Armar/händer >
- Bröst/mage/rumpa >
- Ben/fötter >



04:07

- Öppna upp munnen
- Klicka med tungan
- Räck ut tungan
- Slicka på läpparna
- Spotta

[Tillbaka](#) [Nästa](#)

**Supplementary figure S2. Clinical Global Impression – Improvement and Severity.**

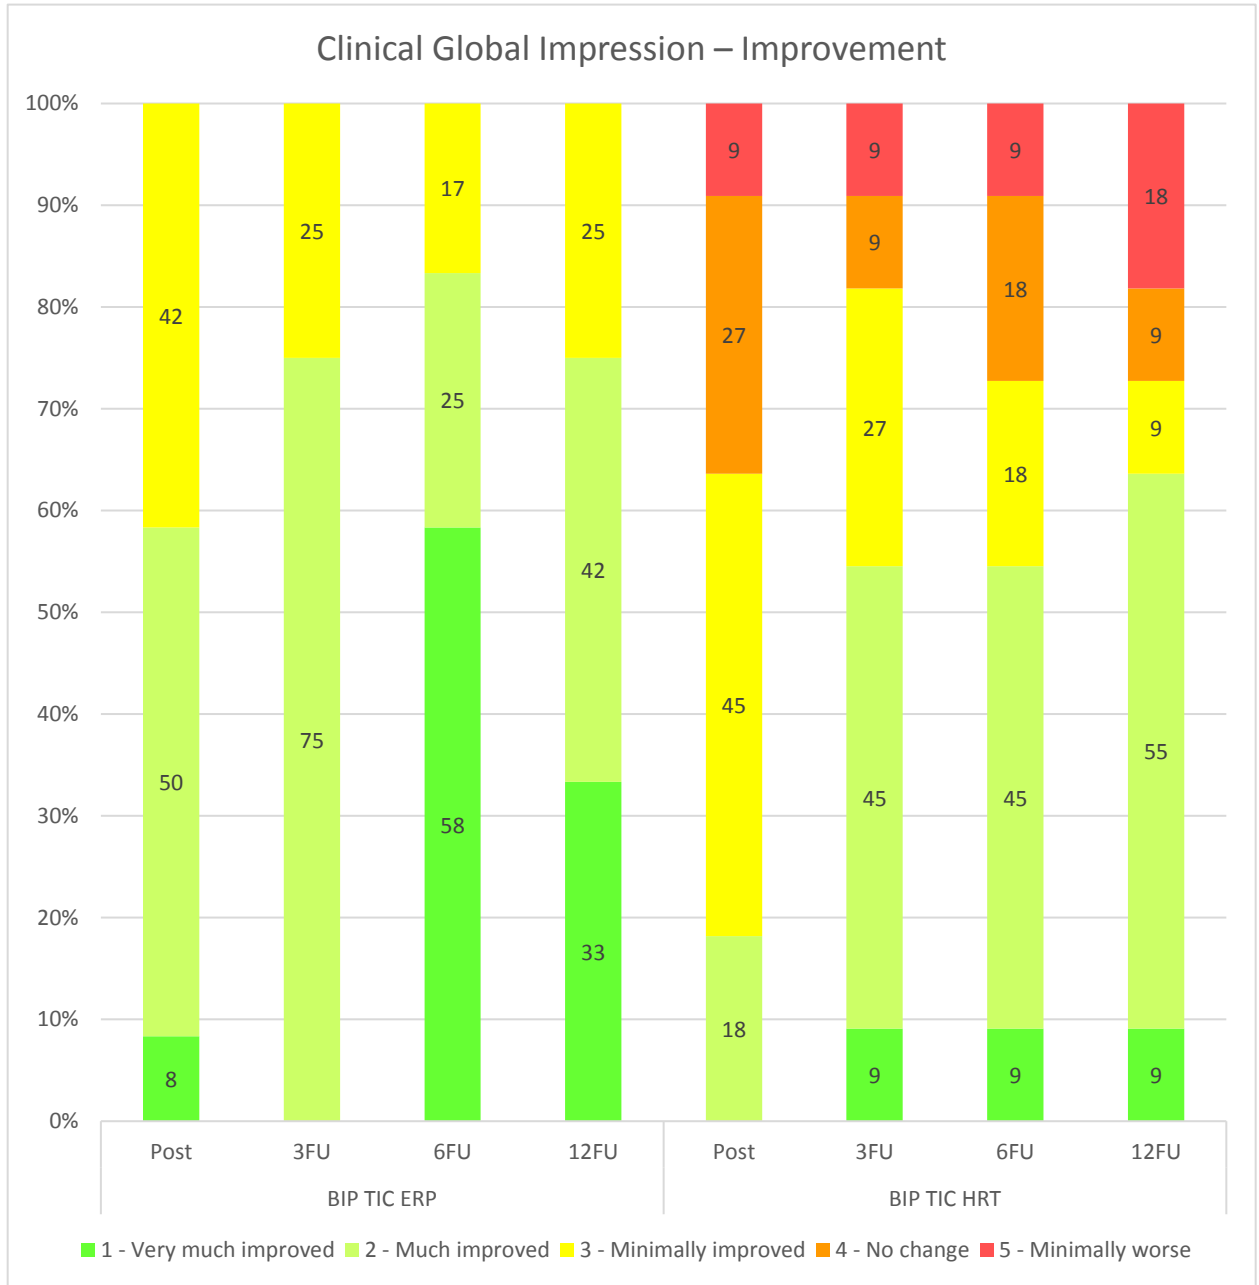



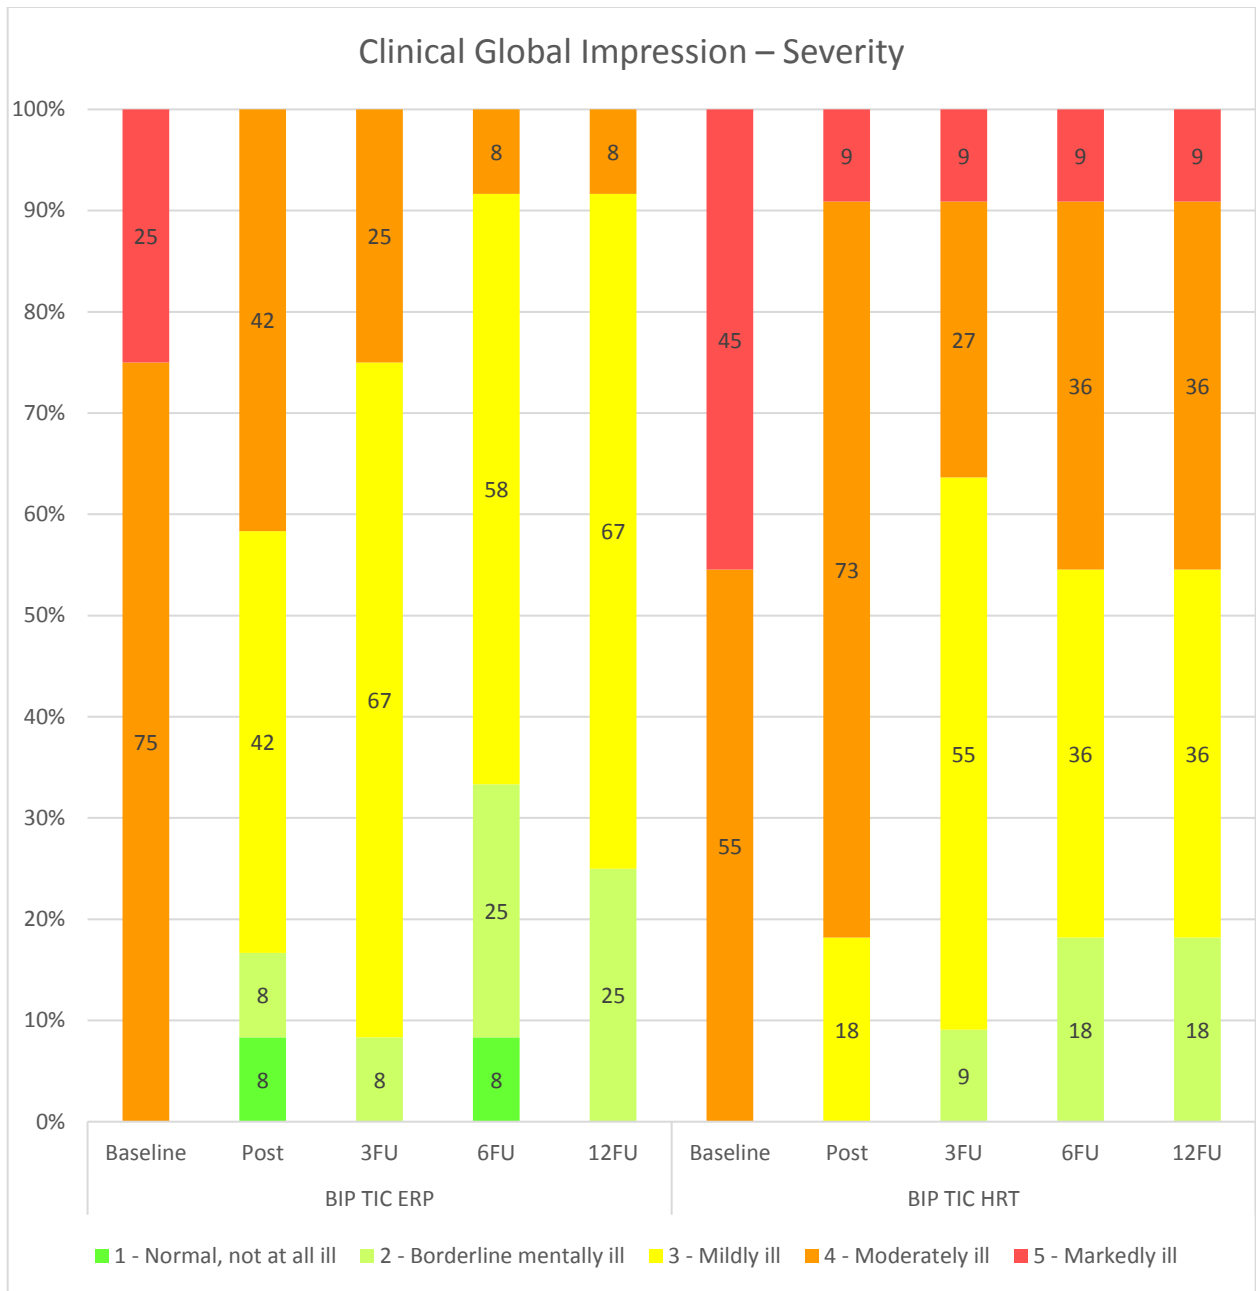

**Note:** Percentage of participants. No participant was scored above 5 (Minimally worse/Markedly ill) in any of the scales. 3FU = 3-month follow-up; 6FU = 6-month follow-up; 12FU = 12-month follow-up; BIP TIC ERP = internet-delivered exposure and response prevention; BIP TIC HRT = internet-delivered habit reversal training; Post = Post-treatment.
